# Supplementary material for: Nanostructured Lipid Carriers Enriched Hydrogels for Skin Topical Administration of Quercetin and Omega-3 Fatty Acid
Source: MDPI journal article supplement (doi:10.3390/pharmaceutics15082078), 2023-08-03
Supplement: s1 [file s1]

## Supplementary materials

# Nanostructured Lipid Carriers Enriched Hydrogels for Skin Topical Administration of Quercetin and Omega-3 Fatty Acid

Marlene Lúcio <sup>1,2,\*</sup>, Nicole Giannino <sup>3,4</sup>, Sérgio Barreira <sup>3</sup>, José Catita <sup>3,5</sup>, Hugo Gonçalves <sup>5</sup>, Artur Ribeiro <sup>6,7</sup>, Eduarda Fernandes <sup>1</sup>, Isabel Carvalho <sup>6,7,8</sup>, Hugo Pinho <sup>3</sup>, Fátima Cerqueira <sup>3,9</sup>, Marco Biondi <sup>4</sup> and Carla M. Lopes <sup>3,10,11,\*</sup>

**Table S1.** Pre-formulation studies of Q (0.2% *w/w*) in different solid and liquid lipids.

| Solid Lipid(s)                                               | 15 minutes | 30 minutes | 45 minutes | 60 minutes |
|--------------------------------------------------------------|------------|------------|------------|------------|
| Precirol® ATO 5                                              | -          | -          | -          | -          |
| Compritol® 888 ATO                                           | -          | -          | -          | -          |
| Cetyl palmitate                                              | -          | -          | -          | -          |
| Gelucire® 50/13                                              | -          | +          | +          | +          |
| Stearic acid                                                 | -          | -          | -          | -          |
| Liquid Lipid(s)                                              |            |            |            |            |
| Miglyol® 812                                                 | -          | -          | -          | -          |
| Capryol 90                                                   | -          | -          | -          | -          |
| Labrasol                                                     | +          | +          | +          | +          |
| Labrafac                                                     | -          | -          | -          | -          |
| ω <sub>3</sub>                                               | -          | -          | -          | -          |
| Lipid Mixture                                                |            |            |            |            |
| Precirol® ATO 5 + Gelucire® 50/13 + ω <sub>3</sub>           | -          | -          | -          | -          |
| Precirol® ATO 5 + Ómega 3                                    | -          | -          | -          | -          |
| Precirol® ATO 5 + Gelucire® 50/13 + Labrasol+ ω <sub>3</sub> | -          | -          | +          | +          |

Abbreviations: Q – quercetin; ω<sub>3</sub> – omega 3 fatty acid. (-) represents samples with macroscopic and microscopic signs of non-solubilization of Q and (+) represents samples with macroscopic and microscopic uniform appearance:

(+) Macroscopic appearance

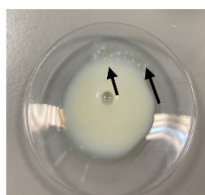

(+) Microscopic appearance

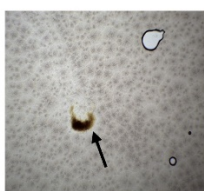

(-) Macroscopic appearance

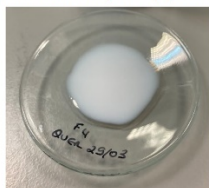

(-) Microscopic appearance

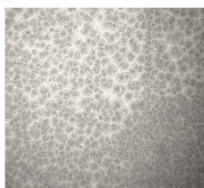

**Table S2.** Composition of nanostructured lipid carriers (NLCs) (*w/w*).

| Components           | NLC1    |        |              |                  | NLC2    |        |              |                  |
|----------------------|---------|--------|--------------|------------------|---------|--------|--------------|------------------|
|                      | Placebo | + Q    | + $\omega_3$ | + Q + $\omega_3$ | Placebo | + Q    | + $\omega_3$ | + Q + $\omega_3$ |
| <b>Lipid phase</b>   |         |        |              |                  |         |        |              |                  |
| Q                    | –       | 0.050  | –            | 0.050            | –       | 0.050  | –            | 0.050            |
| $\omega_3$           | –       | –      | 0.200        | 0.200            | –       | –      | 0.200        | 0.200            |
| Precirol ATO® 5      | 4.200   | 4.179  | 4.116        | 4.095            | 4.200   | 4.179  | 4.116        | 4.095            |
| Gelucire® 50/13      | 2.800   | 2.786  | 2.744        | 2.730            | 2.800   | 2.786  | 2.744        | 2.730            |
| Labrasol®            | 3.000   | 2.985  | 2.940        | 2.925            | 3.000   | 2.985  | 2.940        | 2.925            |
| Soy lecithin         | 1.500   | 1.500  | 1.500        | 1.500            | –       | –      | –            | –                |
| <b>Aqueous phase</b> |         |        |              |                  |         |        |              |                  |
| Poloxamer 407        | 1.500   | 1.500  | 1.500        | 1.500            | –       | –      | –            | –                |
| Tween® 80            | –       | –      | –            | –                | 2.500   | 2.500  | 2.500        | 2.500            |
| DOSS                 | –       | –      | –            | –                | 0.500   | 0.500  | 0.500        | 0.500            |
| Purified water       | 87.000  | 87.000 | 87.000       | 87.000           | 87.000  | 87.000 | 87.000       | 87.000           |

Abbreviations: Q – quercetin;  $\omega_3$  – omega 3 fatty acid; DOSS – dioctyl sodium sulfosuccinate

**Table S3.** DSC thermal events of the NLCs' lipid components and active: enthalpy ( $\Delta H$  in J.g<sup>-1</sup>) and temperature (T in °C) of the transitions.

| Samples                       | T <sub>onset</sub> (°C) | T <sub>peak</sub> (°C)                            | T <sub>endset</sub> (°C) | $\Delta H$ (J.g <sup>-1</sup> )                   |
|-------------------------------|-------------------------|---------------------------------------------------|--------------------------|---------------------------------------------------|
| $\omega_3$                    | –                       | –                                                 | –                        | –                                                 |
| Labrasol®                     | –                       | –                                                 | –                        | –                                                 |
| Precirol ATO® 5               | 38.0                    | 52.0 (shoulder)<br>56.9 (peak)                    | 64.9                     | 22.0 (shoulder)<br>57.3 (peak)                    |
| Gelucire® 50/13               | 22.0                    | 32.0 (peak 1)<br>37.1 (peak 2)<br>44.4 (peak 3)   | 58.0                     | 4.4 (peak 1)<br>8.1 (peak 2)<br>14.2 (peak 3)     |
| Q                             | 116.0                   | 129.2                                             | 139.0                    | 61.2                                              |
| Q in the lipid melted mixture | 19.0                    | 32.0 (peak 1)<br>55.5 (shoulder)<br>59.7 (peak 3) | 63.0                     | 16.0 (peak 1)<br>14.5 (shoulder)<br>37.7 (peak 3) |
| NLC1                          | 23.5                    | 49.5 (peak 1)<br>54.5 (shoulder)<br>64.0 (peak 3) | 65.0                     | 10.0 (peak 1)<br>10.5 (shoulder)<br>29.6 (peak 3) |
| NLC2                          | 23.5                    | 49.5 (peak 1)<br>54.0 (shoulder)<br>59.7 (peak 3) | 65.0                     | 10.0 (peak 1)<br>10.5 (shoulder)<br>37.7 (peak 3) |

**Table S4.** Fittings, using different mathematical models, of Q release kinetics from NLC1 and NLC2 (with or without  $\omega_3$ ) in medium mimetic of skin conditions (pH 5.6 and temperature of  $32 \pm 3$  °C).

| 1 <sup>st</sup> Order kinetics model | NLC                   | Adjusted parameters<br>with 95% confidence<br>interval                                                                                               | R <sup>2</sup> | R <sup>2</sup> adjusted |
|--------------------------------------|-----------------------|------------------------------------------------------------------------------------------------------------------------------------------------------|----------------|-------------------------|
| $y = F_{max}(1 - e^{-kt})$           | NLC1 + Q              | $F_{max} = 61.2$<br>(56.2 – 66.2)<br>$k = 1.26 \times 10^{-3} \text{ min}^{-1}$<br>( $1.09 \times 10^{-3} - 1.42 \times 10^{-3}$ ) $\text{min}^{-1}$ | 0.992          | 0.991                   |
|                                      | NLC1 + Q + $\omega_3$ | $F_{max} = 62.3$<br>(56.4 – 68.2)<br>$k = 1.45 \times 10^{-3} \text{ min}^{-1}$<br>( $1.20 \times 10^{-3} - 1.71 \times 10^{-3}$ ) $\text{min}^{-1}$ | 0.985          | 0.983                   |
|                                      | NLC2 + Q              | $F_{max} = 56.7$<br>(50.0 – 63.4)<br>$k = 7.39 \times 10^{-4} \text{ min}^{-1}$<br>( $6.08 \times 10^{-4} - 8.70 \times 10^{-4}$ ) $\text{min}^{-1}$ | 0.995          | 0.994                   |
|                                      | NLC2 + Q + $\omega_3$ | $F_{max} = 51.7$<br>(47.9 – 55.5)<br>$k = 1.07 \times 10^{-3} \text{ min}^{-1}$<br>( $9.43 \times 10^{-4} - 1.20 \times 10^{-3}$ ) $\text{min}^{-1}$ | 0.995          | 0.994                   |

$F_{max}$  is the total amount of Q released and  $k$  is the first order release constant.

| Korsmeyer–Peppas model | NLC                   | Adjusted parameters with<br>95% confidence interval                                                       | R <sup>2</sup> | R <sup>2</sup> adjusted |
|------------------------|-----------------------|-----------------------------------------------------------------------------------------------------------|----------------|-------------------------|
| $y = at^n$             | NLC1 + Q              | $a = 0.355$<br>(0.185 – 0.525)<br>$n = 0.690$<br>(0.617 – 0.762)                                          | 0.969          | 0.966                   |
|                        | NLC1 + Q + $\omega_3$ | $a = 0.476$<br>(0.208 – 0.745)<br>$n = 0.657$<br>(0.574 – 0.741)                                          | 0.960          | 0.956                   |
|                        | NLC2 + Q              | $a = 0.113$<br>(0.070 – 0.155)<br>$n = 0.800$<br>(0.745 – 0.855)                                          | 0.989          | 0.988                   |
|                        | NLC2 + Q + $\omega_3$ | $a = 0.229$<br>(0.137 – 0.321)<br>$n = 0.716$<br>(0.657 – 0.776)                                          | 0.980          | 0.978                   |
|                        | NLC1 + Q              | $a = 1.459$<br>(1.039 – 1.862)<br>$n = 0.496$<br>(0.454 – 0.538)<br>$l = 105.4$ min<br>(89.1 – 121.7) min | 0.993          | 0.992                   |
| $y = a(t - l)^n$       | NLC1 + Q + $\omega_3$ | $a = 2.131$<br>(1.308 – 2.953)<br>$n = 0.452$<br>(0.396 – 0.509)<br>$l = 111.2$ min<br>(92.4 – 129.9) min | 0.984          | 0.981                   |

|                       |                                               |       |       |
|-----------------------|-----------------------------------------------|-------|-------|
| NLC2 + Q              | $a = 0.441$                                   | 0.998 | 0.998 |
|                       | (0.330 – 0.552)                               |       |       |
|                       | $n = 0.616$                                   |       |       |
|                       | (0.581 – 0.651)                               |       |       |
|                       | $l = 94.3 \text{ min}$<br>(80.5 – 112.2) min  |       |       |
| NLC2 + Q + $\omega_3$ | $a = 0.842$                                   | 0.996 | 0.995 |
|                       | (0.620 – 1.064)                               |       |       |
|                       | $n = 0.539$                                   |       |       |
|                       | (0.502 – 0.577)                               |       |       |
|                       | $l = 100.6 \text{ min}$<br>(83.4 – 117.8) min |       |       |

$a$  is a constant of geometric and structural incorporation that considers the pharmaceutical form;  $n$  is a release representing the mechanism of diffusion of Q, being based on Fick's law, (a value of  $n$  equal to or less than 0.5 indicates a Fickian diffusion, values between 0.5 and 1 indicates a non-Fickian diffusion).  $l$  is the lag time.

| Weibull model                              | NLC                   | Adjusted parameters with<br>95% confidence interval                                                                                                   | R <sup>2</sup> | R <sup>2</sup> adjusted |
|--------------------------------------------|-----------------------|-------------------------------------------------------------------------------------------------------------------------------------------------------|----------------|-------------------------|
| $y = F_{max} \left(1 - e^{(-at^b)}\right)$ | NLC1 + Q              | $a = 2.52 \times 10^{-4}$<br>$(1.97 \times 10^{-4} - 3.06 \times 10^{-4})$<br>$F_{max} = 51.5$<br>$(50.8 - 52.2)$<br>$b = 1.320$<br>$(1.281 - 1.360)$ | 0.999          | 0.999                   |
|                                            | NLC1 + Q + $\omega_3$ | $a = 1.33 \times 10^{-4}$<br>$(6.61 \times 10^{-6} - 2.60 \times 10^{-4})$<br>$F_{max} = 53.8$<br>$(52.0 - 55.6)$<br>$b = 1.458$<br>$(1.289 - 1.627)$ | 0.995          | 0.994                   |
|                                            | NLC2 + Q              | $a = 1.43 \times 10^{-4}$<br>$(1.02 \times 10^{-4} - 1.84 \times 10^{-4})$<br>$F_{max} = 38.4$<br>$(37.6 - 39.2)$<br>$b = 1.369$<br>$(1.315 - 1.423)$ | 0.999          | 0.999                   |
|                                            | NLC2 + Q + $\omega_3$ | $a = 2.57 \times 10^{-4}$<br>$(1.72 \times 10^{-4} - 3.43 \times 10^{-4})$<br>$F_{max} = 42.0$<br>$(40.9 - 42.9)$<br>$b = 1.293$<br>$(1.231 - 1.354)$ | 0.999          | 0.999                   |
|                                            |                       |                                                                                                                                                       |                |                         |

$F_{max}$  is the total amount of Q released and  $a$  is a parameter that defines the time scale of the process. The parameter  $b$  characterizes the shape of the curve. For  $b = 1$  it is sigmoid, for  $b > 1$  is S-shaped with a curvature upwards followed by a turning point, for  $b < 1$  is parabolic with an initial slope and then exponential.

| Higuchi model  | NLC                   | Adjusted parameters<br>with 95% confidence<br>interval | R <sup>2</sup> | R <sup>2</sup> adjusted |
|----------------|-----------------------|--------------------------------------------------------|----------------|-------------------------|
| $y = Kt^{0.5}$ | NLC1 + Q              | $K = 1.188$<br>(1.069 – 1.307)                         | 0.906          | 0.901                   |
|                | NLC1 + Q + $\omega_3$ | $K = 1.334$<br>(1.208 – 1.460)                         | 0.917          | 0.913                   |
|                | NLC2 + Q              | $K = 0.814$<br>(0.713 – 0.916)                         | 0.877          | 0.870                   |
|                | NLC2 + Q + $\omega_3$ | $K = 0.939$<br>(0.852 – 1.026)                         | 0.909          | 0.905                   |

$K$  is the Higuchi dissolution constant.

| Gallagher-Corrigan model                                                                                                | NLC                   | Adjusted parameters with<br>95% confidence interval                                                                                                                                                                                                                                                                                                    | R <sup>2</sup> | R <sup>2</sup> adjusted |
|-------------------------------------------------------------------------------------------------------------------------|-----------------------|--------------------------------------------------------------------------------------------------------------------------------------------------------------------------------------------------------------------------------------------------------------------------------------------------------------------------------------------------------|----------------|-------------------------|
| $y = F_b (1 - e^{-k_1 t}) + (F_{max} - F_b) \left( \frac{e^{k_2 t - k_2 t_{max}}}{1 + e^{k_2 t - k_2 t_{max}}} \right)$ | NLC1 + Q              | $F_b = 1.0$<br>$(0 - 15.4)$<br>$F_{max} = 49.4$<br>$(45.9 - 52.8)$<br>$t_{max} = 387.6 \text{ min}$<br>$(318.1 - 456.8) \text{ min}$<br>$k_1 = 8.16 \times 10^{-3} \text{ min}^{-1}$<br>$(0 - 1.89 \times 10^{-1}) \text{ min}^{-1}$<br>$k_2 = 7.30 \times 10^{-3} \text{ min}^{-1}$<br>$(4.71 \times 10^{-3} - 9.89 \times 10^{-3}) \text{ min}^{-1}$ | 0.981          | 0.975                   |
|                                                                                                                         | NLC1 + Q + $\omega_3$ | $F_b = 6.36 \times 10^{-4}$<br>$(0 - 5.03)$<br>$F_{max} = 53.0$<br>$(48.8 - 56.2)$<br>$t_{max} = 346.3 \text{ min}$<br>$(313.2 - 379.4) \text{ min}$<br>$k_1 = 0.281 \text{ min}^{-1}$<br>$(0.281 - 0.281) \text{ min}^{-1}$<br>$k_1 = 8.44 \times 10^{-3} \text{ min}^{-1}$<br>$(5.72 \times 10^{-3} - 1.12 \times 10^{-2}) \text{ min}^{-1}$         | 0.983          | 0.977                   |
|                                                                                                                         | NLC2 + Q              | $F_b = 1.00 \times 10^{-2}$<br>$(0.00 - 7.63)$<br>$F_{max} = 36.1$<br>$(34.5 - 37.7)$<br>$t_{max} = 420.9 \text{ min}$<br>$(360.1 - 481.7) \text{ min}$<br>$k_1 = 8.65 \times 10^{-3} \text{ min}^{-1}$<br>$(0.00 - 10.4) \text{ min}^{-1}$                                                                                                            | 0.991          | 0.988                   |



|                       |                                                                                                                                                                                        |       |       |
|-----------------------|----------------------------------------------------------------------------------------------------------------------------------------------------------------------------------------|-------|-------|
|                       | $k_2 = 7.37 \times 10^{-3} \text{ min}^{-1}$<br>$(4.72 \times 10^{-3} - 1.00 \times 10^{-2}) \text{ min}^{-1}$                                                                         |       |       |
|                       | $F_b = 7.62 \times 10^{-4}$<br>$(0.00 - 3.14)$<br>$F_{max} = 39.5$<br>$(37.3 - 41.6)$                                                                                                  |       |       |
| NLC2 + Q + $\omega_3$ | $t_{max} = 410.9 \text{ min}$<br>$(375.4 - 446.3) \text{ min}$                                                                                                                         | 0.984 | 0.979 |
|                       | $k_1 = 0.668 \text{ min}^{-1}$<br>$(0.668 - 0.668) \text{ min}^{-1}$<br>$k_2 = 6.79 \times 10^{-3} \text{ min}^{-1}$<br>$(4.78 \times 10^{-3} - 8.80 \times 10^{-3}) \text{ min}^{-1}$ |       |       |

$F_b$  is the amount of Q released directly from surface of the system (initial burst),  $F_{max}$  is the amount of Q released during the process,  $t_{max}$  is the time (in hours) in which occurs the release of maximum amount of Q directly from the surface of system (after burst),  $k_1$  and  $k_2$  are constants of release ( $\text{h}^{-1}$ ) of first and second phase, respectively.

**Table S5.** Statistical analysis applied to the antioxidant effect results. Comparisons were performed using one-way ANOVA with the Tukey's multiple comparison test (*p-value* <0.05).

| Paired observations                            | [Antioxidant] mM | [MDA] $\mu$ M |
|------------------------------------------------|------------------|---------------|
| NLC1 Placebo vs NLC1 + Q                       | **               | ***           |
| NLC1 Placebo vs NLC1 + $\omega_3$              | ns               | ***           |
| NLC1 Placebo vs NLC1 + Q + $\omega_3$          | ***              | ns            |
| NLC1 + Q vs NLC1 + Q + $\omega_3$              | ***              | ***           |
| NLC1 Placebo vs NLC2 Placebo                   | ns               | ns            |
| NLC1 + Q vs NLC2 + Q                           | ***              | ***           |
| NLC1 + $\omega_3$ vs NLC2 + $\omega_3$         | ns               | ***           |
| NLC1 + Q + $\omega_3$ vs NLC2 + Q + $\omega_3$ | ***              | ***           |
| NLC2 Placebo vs NLC2 + Q                       | ***              | ***           |
| NLC2 Placebo vs NLC2 + $\omega_3$              | ns               | ***           |
| NLC2 Placebo vs NLC2 + Q + $\omega_3$          | ***              | ***           |
| NLC2 + Q vs NLC2 + Q + $\omega_3$              | ns               | ns            |
| Q vs $\omega_3$                                | ***              | ***           |
| Q vs Q + $\omega_3$                            | ns               | ***           |
| $\omega_3$ vs Q + $\omega_3$                   | ***              | ***           |
| NLC1 + Q vs Q                                  | ***              | ***           |
| NLC2 + Q vs Q                                  | ***              | ns            |
| NLC1 + $\omega_3$ vs $\omega_3$                | ns               | *             |
| NLC2 + $\omega_3$ vs $\omega_3$                | ns               | ***           |
| NLC1 + Q + $\omega_3$ vs Q + $\omega_3$        | ns               | ***           |
| NLC2 + Q + $\omega_3$ vs Q + $\omega_3$        | ***              | ***           |

\*\*\* indicates a value of  $p < 0.001$ , \*\* indicates a value of  $p < 0.01$  and \* indicates a value of  $p < 0.05$  which were considered statistically significant. ns indicates no statistical significance.

**Table S6.** [MDA] in mg/Kg

|                       |      |
|-----------------------|------|
| NLC1 Placebo          | 5.5  |
| NLC1 + Q              | 2.9  |
| NLC1 + $\omega_3$     | 3.7  |
| NLC1 + Q + $\omega_3$ | 6.0  |
| NLC2 Placebo          | 5.7  |
| NLC2 + Q              | 0.0  |
| NLC2 + $\omega_3$     | 0.3  |
| NLC2 + Q + $\omega_3$ | 0.3  |
| Q                     | 0.0  |
| $\omega_3$            | 4.9  |
| Q + $\omega_3$        | 12.4 |

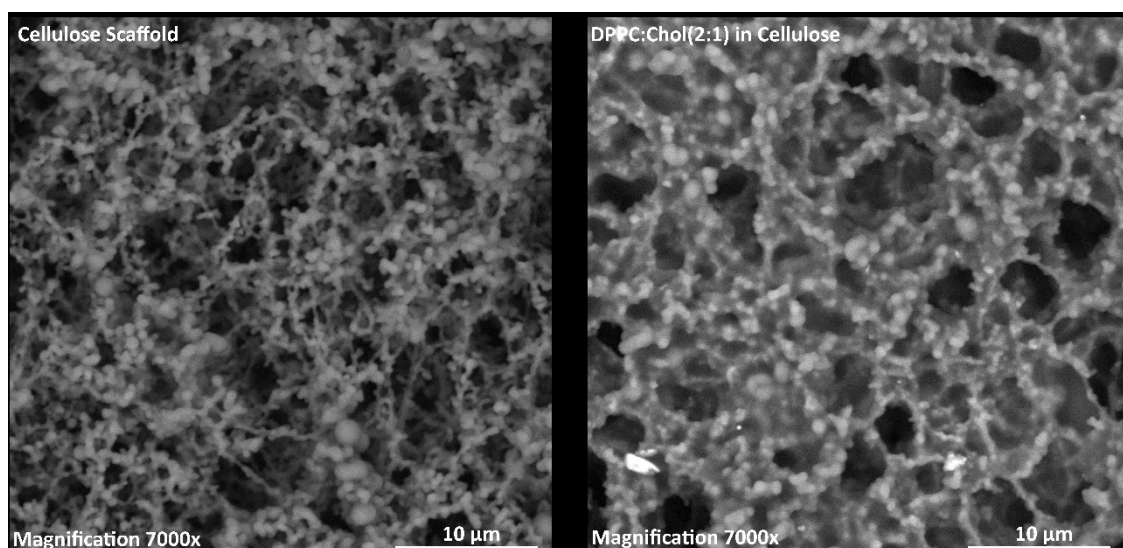

**Figure S1.** Morphological characterization of a mimetic *stratum corneum* model, demonstrating the lipid coverage of the scaffold while maintaining the integrity of its pores at the same magnification.

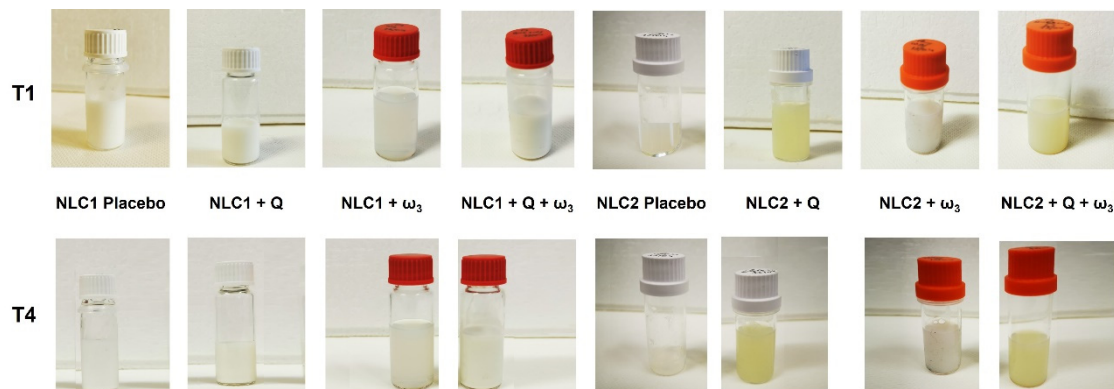

**Figure S2.** Macroscopic appearance of the NLCs' formulations in shelf conditions (4 °C temperature with no light exposure) on the preparation day (T1) and after four weeks (T4).

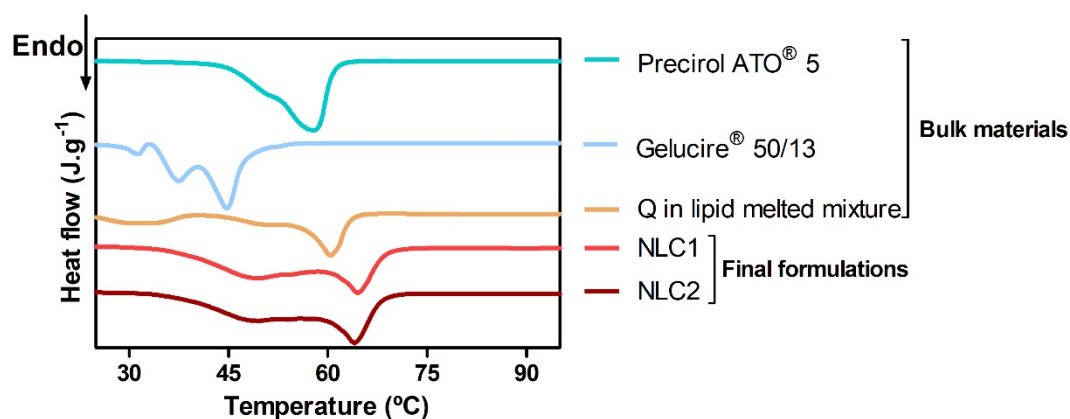

**Figure S3.** DSC thermograms of the NLCs components and Q in the lipid melted mixture (physical mixture of bulk materials) and of the final formulations NLC1 and NLC 2, performed after evaporation of the aqueous phase.

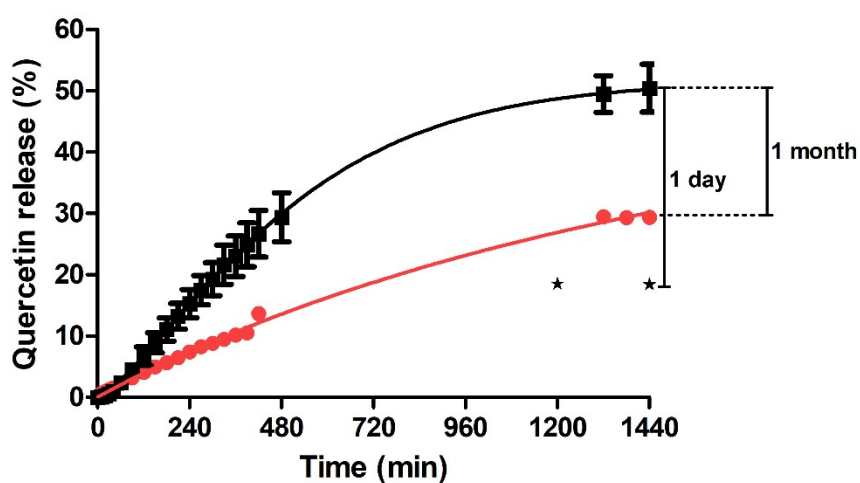

**Figure S4.** Quercetin release over time. Black squares – quercetin quantified immediately after its release from NLC1+Q freshly produced (T1). Red circles - quercetin quantified immediately after its release from NLC1+Q stored 1 month in the fridge (T4). Black stars - quercetin quantified 1 day after its release from NLC1+Q freshly produced (T1).

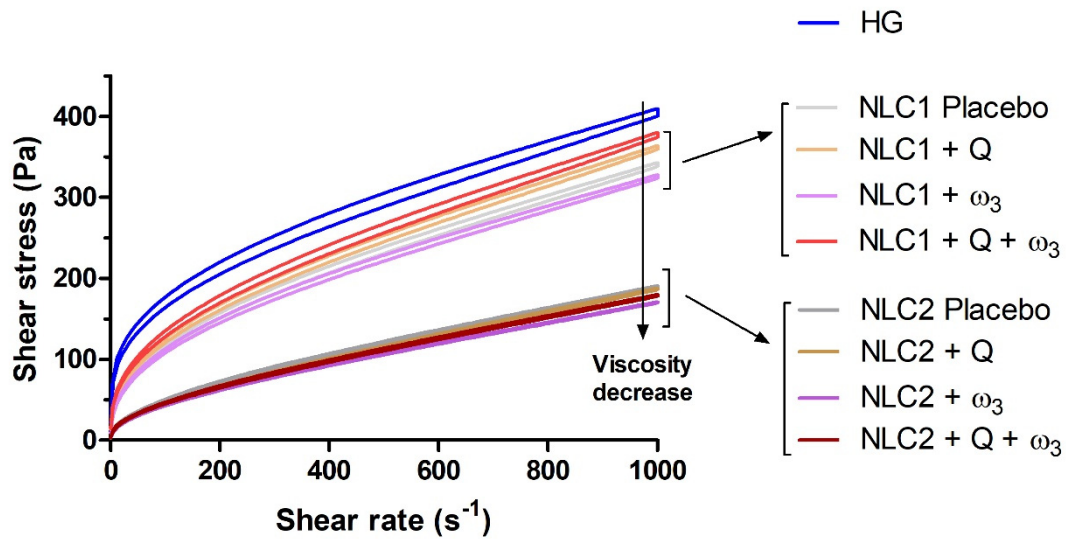

**Figure S5.** Rheological analysis of NLCs enriched HGs

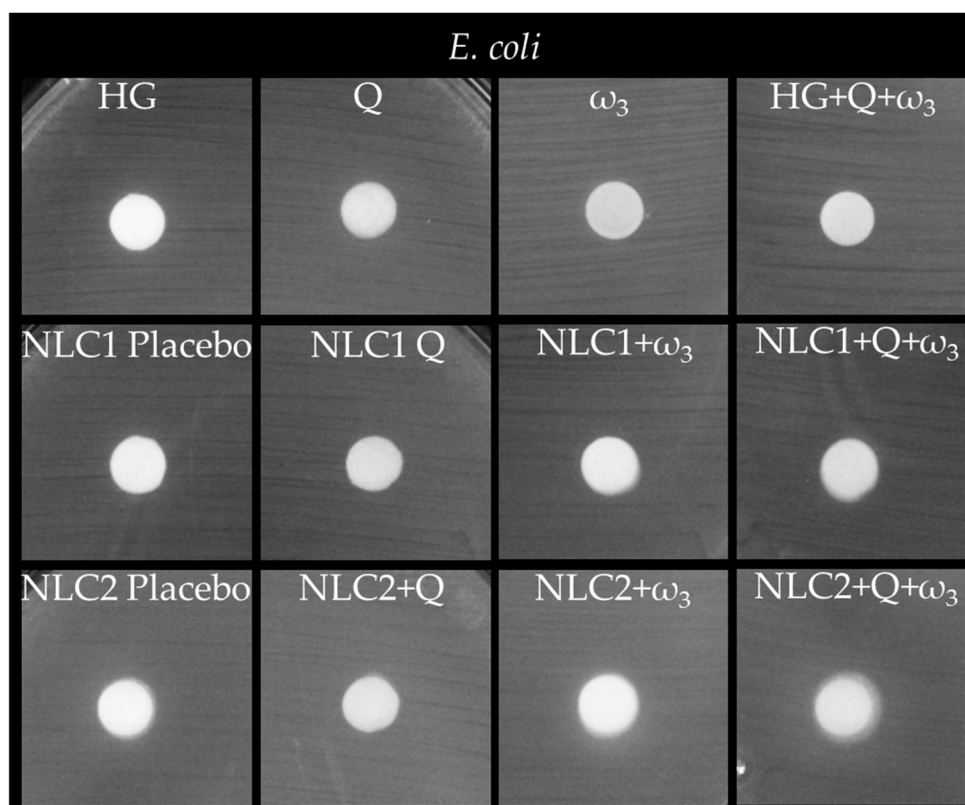

**Figure S6.** Evaluation of antibacterial activity of NLCs enriched hydrogels by the disk agar diffusion method against *E. coli*.

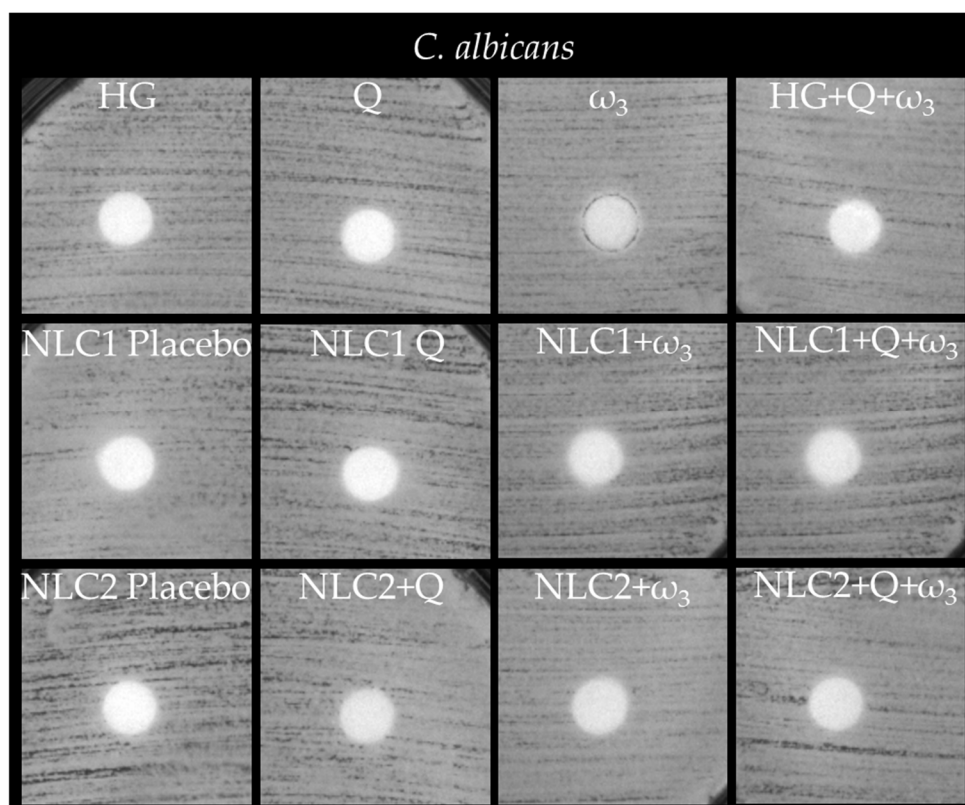

**Figure S7.** Evaluation of antifungal activity of NLCs enriched hydrogels by the disk agar diffusion method against *C. albicans*.

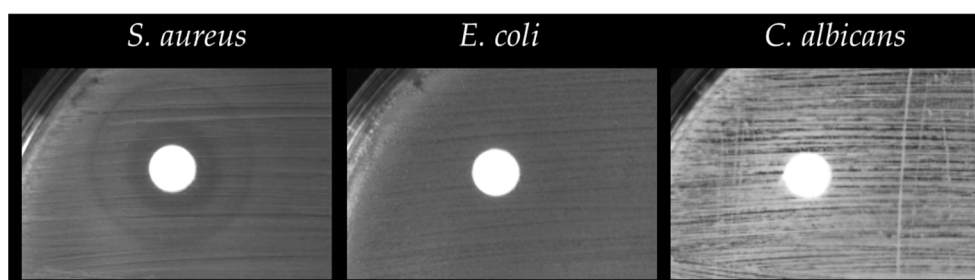

**Figure S8.** Evaluation of antibacterial and antifungal activities of the combination of Tween® 80 and DOSS by the disk agar diffusion method.
